# Supplementary material
Source: PubMed Central journal article supplement (PMC8096187)
Supplement: pcc-22-e285-s004.pdf [file pcc-22-e285-s004.pdf]

**Supplement 2: Table summarising UK and available international guidelines for PIMS-TS published prior to July 29<sup>th</sup> 2020**

| Source (Hospital or network)                     | Date published (2020) | Type                                            | Process                   | Antiviral                                      | IVIG                                                          | Glucocorticoids                                                         | Biologics                                                             | Antiplatelet                                       | Anticoagulation                                                  |
|--------------------------------------------------|-----------------------|-------------------------------------------------|---------------------------|------------------------------------------------|---------------------------------------------------------------|-------------------------------------------------------------------------|-----------------------------------------------------------------------|----------------------------------------------------|------------------------------------------------------------------|
| Nottingham                                       | 4 May                 | Internal                                        | MDT                       |                                                | If KD                                                         | MP 30mg/kg 3 days if KD or severe or IVIG resistant (all PICU patients) | Anakinra if IL-1 raised or MAS features<br>Tocilizumab if IL-6 raised | If coronary involvement                            | If coronary involvement                                          |
| Evelina London                                   | 11 May                | Internal, available online                      | MDT                       |                                                | 2g/kg                                                         | MP 3-10mg/kg OD 3 days                                                  | Consider                                                              | High dose Aspirin                                  | LMWH prophylaxis                                                 |
| Manchester                                       | 12 May                | Internal                                        | MDT                       |                                                | 2g/kg                                                         | All shocked patients MP 10 – 30mg/kg OD (max 1g) for three days         | Discuss with rheumatology if no improvement with IVIG or MP           | High dose if KD                                    |                                                                  |
| North Thames Paediatric Network (St Mary's)      | 19 May                | Internal, available online                      | MDT from multiple centres | Consider if PCR positive                       | Yes                                                           | yes                                                                     | No mention                                                            | Low dose aspirin                                   | LMWH                                                             |
| Leeds                                            | 22 May                | Internal                                        | MDT                       |                                                | 2g/kg<br>Repeat dose if poor response 48 hours                | Consider MP 10-30mg/kg                                                  | MDT to consider                                                       | Aspirin 5mg/kg (max 75mg) but 12.5mg/kg QDS if KD  | GCS if non- mobile. Consider LMWH if not on high dose aspirin    |
| St George's                                      | 26 May                | Internal, available online                      | MDT                       | Consider                                       | Consider                                                      | Consider                                                                | No mention                                                            | Consider (no dose)                                 | Consider heparin                                                 |
| Great Ormond Street                              | 28 May                | Internal                                        | MDT                       |                                                | Consider 1 or 2g/kg                                           | Consider MP (10-30mg/Kg OD, max 1g)                                     | Discuss Anakinra, Infliximab, Tocilizumab                             | High dose aspirin 30mg/kg/day then 3-5mg/Kg/day    | LMWH                                                             |
| Oxford                                           | May                   | Internal                                        | MDT                       |                                                | 2g/kg if KD                                                   | Consider 10mg/kg MP if TSS, give if refractory to IVIG                  | Consider if refractory to treatment                                   | Aspirin (no dose)                                  | Advised (not specified)                                          |
| Birmingham/ KIDS intensive care transfer service | May                   | Internal, available online                      | MDT                       |                                                | 2g/kg                                                         | 10mg/kg IV MP up to 30mg/kg max 1g                                      | Consider Infliximab or Anakinra                                       | Aspirin 12.5mg/kg QDS until afebrile then 2-5mg/kg |                                                                  |
| UK PIMS-TS National Consensus Management Group   | 23 July               | Pre-peer review <sup>1</sup> , available online | Delphi                    | Consider Remdesivir if PCR positive            | 2g/kg<br>Consider 2 <sup>nd</sup> dose if not fully responded | Enrol RECOVERY trial if high risk or unwell 24 hours post IVIG          | Enrol RECOVERY trial, consider if no response                         | Low dose aspirin or high dose if KD                | GCS if >12 years                                                 |
| King's College                                   | July                  | Internal                                        | MDT                       |                                                | 2g/kg                                                         | All patients with shock- variable dosing                                | Consider                                                              | All Dose by MDT                                    | LMWH                                                             |
| Leicester Children's                             | July                  | Internal, available online                      | MDT                       | Consider if PCR positive and in Recovery trial | KD complete or incomplete criteria                            | Resistant or refractory disease                                         | No mention                                                            | Aspirin (no dose)                                  | Heparin if critical illness. Consider: mild/moderate cases or KD |
| Cardiff, Wales                                   | July                  | Internal                                        | MDT                       |                                                | 2g/kg                                                         | MP at 48 hours if culture negative                                      | At 96h Infliximab, Anakinra, Tocilizumab via RECOVERY trial           | Aspirin (no dose)                                  |                                                                  |
| Cambridge                                        | July                  | Internal                                        | MDT                       |                                                | 2g/kg                                                         | MP 10mg/kg to 30mg/kg (max 1g)                                          | Discuss Anakinra, Infliximab, Tocilizumab                             | 12.5mg/kg QDS Aspirin                              | LMWH                                                             |

### Available international guidance

|                                   |         |                                                            |                    |                             |                                                    |                                                                           |                               |                                         |                                                                   |
|-----------------------------------|---------|------------------------------------------------------------|--------------------|-----------------------------|----------------------------------------------------|---------------------------------------------------------------------------|-------------------------------|-----------------------------------------|-------------------------------------------------------------------|
| University of Buffalo, New York   | 23 May  | Publication as editorial <sup>2</sup> , not peer reviewed. | MDT and CDC advice |                             | All patients<br>2g/kg                              | ALL PICU patients<br>High dose MP<br>Consider if KD                       | Consider                      | Aspirin if KD                           | LMWH                                                              |
| Children Hospital of Philadelphia | 8 July  | Internal online                                            | Not reported       | Not indicated even if PCR + | 2g/kg                                              | Oral prednisolone 2mg/kg/day or IV MP 1mg/kg /dose BD                     |                               | Aspirin 3-5mg/kg OD if coronary ectasia | LMWH                                                              |
| American College of Rheumatology  | 23 July | Peer reviewed publication <sup>3</sup>                     | Delphi             |                             | Consider 1-2g/kg but slow if poor cardiac function | MP 1-2g/kg with non-mild illness (shock). Consider higher doses with LTC. | Advise Anakinra if refractory | 3-5mg/kg if f KD or thrombocytosis      | LMWH if coronary aneurysm (z score>10) or moderate LV dysfunction |

Blank boxes indicate that guideline does not mention therapy

#### Abbreviations

MDT multidisciplinary team consensus; CDC Centers for Disease Control and prevention, USA; PCR polymerase chain reaction for SARS-2-CoV; RECOVERY trial Randomised Evaluation of COVID-19 thERapY (<https://doi.org/10.1186/ISRCTN50189673>); KD Kawasaki disease features; OD once daily; MP methylprednisolone; TSS toxic shock syndrome features; LTC life threatening complications; KD kawasaki disease phenotype; TSS toxic shock syndrome; LMWH Low molecular weight heparin prophylaxis; GCS Graduated compression Stocking; LV left ventricle

#### References

- 1: Harwood R, Allin B, Jones CE, et al. For and on behalf of the PIMS-TS National Consensus Management Study Group. A national consensus management pathway for Paediatric Inflammatory Multisystem Syndrome - Temporally associated with SARS-CoV-2 (PIMS-TS): The results of a national Delphi process. Pre print BMJ. <https://doi.org/10.1101/2020.07.17.20156075>
- 2: Hennon T, Penque M, Hicar M et al. COVID-19 associated Multisystem Inflammatory Syndrome in Children (MIS-C) guidelines; a Western New York approach Prog Pediatr Cardiol. 2020 May 23 : 101232.doi: 10.1016/j.ppedcard.2020.101232.
- 3: Henderson LA, Canna SW, Friedman KG, et al. American College of Rheumatology Clinical Guidance for Pediatric Patients with Multisystem Inflammatory Syndrome in Children (MIS-C) Associated with SARS-CoV-2 and Hyperinflammation in COVID-19. Version 1 [published online ahead of print, 2020 Jul 23]. Arthritis Rheumatol. 2020;10.1002/art.41454. doi:10.1002/art.41454
